# Supplementary material
Source: ML conference proceedings conference paper supplement (https://openreview.net/forum?id=XOCbdqxAR2)
Supplement: supplementary_material [file attachment]

## 9 Appendix

Here, we provide the proof of Proposition 5. The proof makes use of the following two propositions, which we present and prove next.

**Proposition 6.** Let  $\{\theta^t\}_{t \in \mathbb{N}}$  be a sequence generated by Algorithm 2. Then, for all  $t \in \mathbb{N}$  and  $0 \leq k \leq K - 1$ , we have

$$H(\theta^t, \theta^*) - H(\theta^t, w^{t,k}) \leq \frac{F_\theta^2}{2F_w} \|\theta^t - \theta^*\|^2 - \left( \frac{1}{\alpha} - \frac{L}{2} \right) \|w^{t,k+1} - w^{t,k}\|^2.$$

*Proof.* Let  $t \in \mathbb{N}$ . From the  $F_w$ -strong convexity of  $w \rightarrow H(\theta^t, w)$ , we obtain that

$$H(\theta^t, w^{t,k+1}) \geq H(\theta^t, \theta^*) + \langle \nabla_w H(\theta^t, \theta^*), w^{t,k+1} - \theta^* \rangle + \frac{F_w}{2} \|w^{t,k+1} - \theta^*\|^2,$$

which means that

$$H(\theta^t, \theta^*) - H(\theta^t, w^{t,k+1}) \leq \langle \nabla_w H(\theta^t, \theta^*), \theta^* - w^{t,k+1} \rangle - \frac{F_w}{2} \|w^{t,k+1} - \theta^*\|^2. \quad (8)$$

Moreover, in light of the fixed-point characterization of TD, namely that  $\nabla_w H(\theta^*, \theta^*) = \mathbf{0}$ , we can write

$$\begin{aligned} \langle \nabla_w H(\theta^t, \theta^*), \theta^* - w^{t,k+1} \rangle &= \langle \nabla_w H(\theta^t, \theta^*) - \nabla_w H(\theta^*, \theta^*), \theta^* - w^{t,k+1} \rangle \\ &= (\nabla_w H(\theta^t, \theta^*) - \nabla_w H(\theta^*, \theta^*))^\top (\theta^* - w^{t,k+1}) \\ &\leq \frac{1}{2F_w} \|\nabla_w H(\theta^t, \theta^*) - \nabla_w H(\theta^*, \theta^*)\|^2 + \frac{F_w}{2} \|w^{t,k+1} - \theta^*\|^2 \\ &\leq \frac{F_\theta^2}{2F_w} \|\theta^t - \theta^*\|^2 + \frac{F_w}{2} \|w^{t,k+1} - \theta^*\|^2. \end{aligned} \quad (9)$$

Here, the first inequality follows from the fact that for any two vectors  $a$  and  $b$  we have  $a^\top b \leq (1/2d)\|a\|^2 + (d/2)\|b\|^2$  for any  $d > 0$ . In this case, we chose  $d = F_w$ . Also the last inequality follows from the  $F_\theta$ -Lipschitz property of  $\nabla_w H$ , which is our assumption.

Now, by combining (8) with (9) we obtain that

$$\begin{aligned} H(\theta^t, \theta^*) - H(\theta^t, w^{t,k+1}) &\leq \frac{F_\theta^2}{2F_w} \|\theta^t - \theta^*\|^2 + \frac{F_w}{2} \|w^{t,k+1} - \theta^*\|^2 - \frac{F_w}{2} \|w^{t,k+1} - \theta^*\|^2 \\ &= \frac{F_\theta^2}{2F_w} \|\theta^t - \theta^*\|^2. \end{aligned} \quad (10)$$

From the Lipschitz assumption we can write, due to the Descent Lemma [19] applied to the function  $w \rightarrow H(\theta^t, w)$ , that:

$$H(\theta^t, w^{t,k+1}) - H(\theta^t, w^{t,k}) \leq \langle \nabla_w H(\theta^t, w^{t,k}), w^{t,k+1} - w^{t,k} \rangle + \frac{L}{2} \|w^{t,k+1} - w^{t,k}\|^2$$

Now, notice that according to Algorithm 2 we have  $w^{t,k+1} = w^{t,k} - \alpha \nabla_w H(\theta^t, w^{t,k})$ , and so we can write:

$$\begin{aligned} H(\theta^t, w^{t,k+1}) - H(\theta^t, w^{t,k}) &\leq \frac{1}{\alpha} \langle w^{t,k} - w^{t,k+1}, w^{t,k+1} - w^{t,k} \rangle + \frac{L}{2} \|w^{t,k+1} - w^{t,k}\|^2 \\ &= - \left( \frac{1}{\alpha} - \frac{L}{2} \right) \|w^{t,k+1} - w^{t,k}\|^2. \end{aligned} \quad (11)$$

Adding both sides of (10) with (11) yields:

$$H(\theta^t, \theta^*) - H(\theta^t, w^{t,k}) \leq \frac{F_\theta^2}{2F_w} \|\theta^t - \theta^*\|^2 - \left( \frac{1}{\alpha} - \frac{L}{2} \right) \|w^{t,k+1} - w^{t,k}\|^2,$$

which proves the desired result.  $\square$

536 Now, we can prove the following result.

537 **Proposition 7.** Let  $\{\theta^t\}_{t \in \mathbb{N}}$  be a sequence generated by Algorithm 2. Then, for all  $t \in \mathbb{N}$  and  
 538  $0 \leq k \leq K-1$ , we have

$$\|w^{t,k+1} - \theta^*\|^2 \leq (1 - \alpha F_w) \|w^{t,k} - \theta^*\|^2 + \frac{\alpha F_\theta^2}{F_w} \|\theta^t - \theta^*\|^2 - (2 - \alpha L) \|w^{t,k+1} - w^{t,k}\|^2.$$

539 In particular, when  $\alpha = 1/L$ , we have

$$\|w^{t,k+1} - \theta^*\|^2 \leq \left(1 - \frac{F_w}{L}\right) \|w^{t,k} - \theta^*\|^2 + \frac{F_\theta^2}{LF_w} \|\theta^t - \theta^*\|^2.$$

540 *Proof.* Let  $t \in \mathbb{N}$ . From the definition of steps of Algorithm 2, that is,  $w^{t,k+1} = w^{t,k} -$   
 541  $\alpha \nabla_w H(\theta^t, w^{t,k})$ , for any  $0 \leq k \leq K-1$ , we obtain that

$$\begin{aligned} \|w^{t,k+1} - \theta^*\|^2 &= \|(w^{t,k} - \theta^*) - \alpha \nabla_w H(\theta^t, w^{t,k})\|^2 \\ &= \|w^{t,k} - \theta^*\|^2 + 2\alpha \langle \nabla_w H(\theta^t, w^{t,k}), \theta^* - w^{t,k} \rangle + \|\alpha \nabla_w H(\theta^t, w^{t,k})\|^2 \\ &= \|w^{t,k} - \theta^*\|^2 + 2\alpha \langle \nabla_w H(\theta^t, w^{t,k}), \theta^* - w^{t,k} \rangle + \|w^{t,k+1} - w^{t,k}\|^2. \end{aligned} \quad (12)$$

542 Using the  $F_w$ -strong convexity of  $w \rightarrow H(\theta^t, w)$ , we have

$$H(\theta^t, \theta^*) \geq H(\theta^t, w^{t,k}) + \langle \nabla_w H(\theta^t, w^{t,k}), \theta^* - w^{t,k} \rangle + \frac{F_w}{2} \|w^{t,k} - \theta^*\|^2. \quad (13)$$

543 Combining (12) and (13), we get:

$$\begin{aligned} \|w^{t,k+1} - \theta^*\|^2 &\leq \|w^{t,k} - \theta^*\|^2 + 2\alpha \left( H(\theta^t, \theta^*) - H(\theta^t, w^{t,k}) - \frac{F_w}{2} \|w^{t,k} - \theta^*\|^2 \right) \\ &\quad + \|w^{t,k+1} - w^{t,k}\|^2 \\ &= (1 - \alpha F_w) \|w^{t,k} - \theta^*\|^2 + 2\alpha (H(\theta^t, \theta^*) - H(\theta^t, w^{t,k})) + \|w^{t,k+1} - w^{t,k}\|^2. \end{aligned}$$

544 Hence, from Proposition 6, we obtain

$$\begin{aligned} \|w^{t,k+1} - \theta^*\|^2 &\leq (1 - \alpha F_w) \|w^{t,k} - \theta^*\|^2 + 2\alpha \left( \frac{F_\theta^2}{2F_w} \|\theta^t - \theta^*\|^2 - \left( \frac{1}{\alpha} - \frac{L}{2} \right) \|w^{t,k+1} - w^{t,k}\|^2 \right) \\ &\quad + \|w^{t,k+1} - w^{t,k}\|^2 \\ &= (1 - \alpha F_w) \|w^{t,k} - \theta^*\|^2 + \frac{\alpha F_\theta^2}{F_w} \|\theta^t - \theta^*\|^2 - (2 - \alpha L) \|w^{t,k+1} - w^{t,k}\|^2, \end{aligned}$$

545 which completes the first desired result.

546 Moreover, by specifically choosing the step-size  $\alpha = 1/L$  we obtain that:

$$\begin{aligned} \|w^{t,k+1} - \theta^*\|^2 &\leq \left(1 - \frac{F_w}{L}\right) \|w^{t,k} - \theta^*\|^2 + \frac{F_\theta^2}{LF_w} \|\theta^t - \theta^*\|^2 - \|w^{t,k+1} - w^{t,k}\|^2 \\ &\leq \left(1 - \frac{F_w}{L}\right) \|w^{t,k} - \theta^*\|^2 + \frac{F_\theta^2}{LF_w} \|\theta^t - \theta^*\|^2. \end{aligned}$$

547 This concludes the proof of this proposition.  $\square$

548 Using these two results, we are ready to present the proof of Proposition 5

549 *proof of Proposition 5.* Let  $t \in \mathbb{N}$ . From Proposition 7 (recall that  $\alpha = 1/L$ ) and the fact that  
 550  $\theta^{t+1} = w^{t,K}$ , we have

$$\begin{aligned}
 \|\theta^{t+1} - \theta^*\|^2 &= \|w^{t,K} - \theta^*\|^2 \\
 &\leq (1 - \kappa) \|w^{t,K-1} - \theta^*\|^2 + \eta^2 \kappa \|\theta^t - \theta^*\|^2 \\
 &\leq (1 - \kappa) [(1 - \kappa) \|w^{t,K-2} - \theta^*\|^2 + \eta^2 \kappa \|\theta^t - \theta^*\|^2] + \eta^2 \kappa \|\theta^t - \theta^*\|^2 \\
 &= (1 - \kappa)^2 \|w^{t,K-2} - \theta^*\|^2 + \eta^2 \kappa (1 + (1 - \kappa)) \|\theta^t - \theta^*\|^2 \\
 &\leq \dots \\
 &\leq (1 - \kappa)^K \|w^{t,0} - \theta^*\|^2 + \eta^2 \kappa \sum_{k=0}^{K-1} (1 - \kappa)^k \|\theta^t - \theta^*\|^2 \\
 &= (1 - \kappa)^K \|\theta^t - \theta^*\|^2 + \eta^2 \kappa \sum_{k=0}^{K-1} (1 - \kappa)^k \|\theta^t - \theta^*\|^2,
 \end{aligned}$$

551 where the last inequality follows from the fact that  $w^{t,0} = \theta^t$ . Because  $\kappa \in [0, 1]$ , the geometric  
 552 series on the right hand side is convergent, and so we can write:

$$(1 - \kappa)^K + \eta^2 \kappa \sum_{k=0}^{K-1} (1 - \kappa)^k = (1 - \kappa)^K + \eta^2 \kappa \frac{1 - (1 - \kappa)^K}{1 - (1 - \kappa)} = (1 - \kappa)^K + \eta^2 (1 - (1 - \kappa)^K),$$

553 which completes the desired result.
